# Supplementary material for: The stability and spicy taste masking effect of capsaicin loaded α-lactalbumin micelles formulated in defatted cheese
Source: Royal Society of Chemistry journal article supplement (doi:10.1039/d2fo01073a), 2022-01-01
Supplement: d2fo01073a1.pdf [file d2fo01073a1.pdf]

## Supporting Information

### **The stability and spicy taste masking effect of capsaicin loaded $\alpha$ -lactalbumin micelles formulated in defatted cheese**

*Zekun Li<sup>2</sup>, Zhenmin Liu<sup>1</sup>, Haibo Mu<sup>1</sup>, Yidi Liu<sup>2</sup>, Yihan Zhang<sup>2</sup>, Qimeng Wang<sup>2</sup>, Laura Estefania Erazo Quintero<sup>2</sup>, Xing Li<sup>2</sup>, Shanan Chen<sup>2</sup>, Yifu Gong<sup>2</sup>, Yiming Wang<sup>2</sup>, Rui Sun<sup>2</sup>, Liang Zhao<sup>2</sup>, Yuan Li<sup>2</sup>.\**

<sup>1</sup>State Key Laboratory of Dairy Biotechnology, Shanghai Engineering Research Center of Dairy Biotechnology, Dairy Research Institute, Bright Dairy and Food Company Limited, 200436, Shanghai, China

<sup>2</sup>Research Center of Food Colloids and Delivery of Functionality, College of Food Science and Nutritional Engineering, China Agricultural University, Beijing 100083, China.

\*Corresponding author: Yuan Li, E-mail: yuanli@cau.edu.cn. Fax/Tel: +86-10-62738589

**Table S1. The zeta-potential (mV) of nanomicelles (M), M(Cap) and Cap embedded amount (mg g<sup>-1</sup>) by M.**

|        | Average particle size (nm) | Zeta potential (mV) | Embedded amount (mg g <sup>-1</sup> ) |
|--------|----------------------------|---------------------|---------------------------------------|
| M      | 21.2±1.9                   | -19.27±0.55         |                                       |
| M(Cap) | 23.6±2.4                   | -23.47±0.87         | 123.4±6.1                             |

**Table S2. Comparison of texture indexes of cheeses.**

|         | F               | DF         | DF+M(Cap)  |            |
|---------|-----------------|------------|------------|------------|
| Texture |                 |            |            |            |
|         | Rigidity(N)     | 20.49±4.29 | 33.23±1.31 | 35.17±4.83 |
|         | Elasticity(N)   | 3.28±0.01  | 0.55±0.20  | 0.65±0.06  |
|         | Cohesion(N)     | 1.48±0.04  | 0.27±0.01  | 0.31±0.16  |
|         | Adhesivity(N)   | 28.71±4.95 | 9.08±0.84  | 14.29±5.61 |
|         | Chewiness(N)    | 99.10±3.09 | 5.08±2.22  | 9.49±4.46  |
|         | Cohesiveness(N) | 0.56±0.03  | 0.51±0.24  | 0.57±0.13  |

**Table.S3. Properties and spiciness preference scale of cheeses.**

|                       | 1                                                       | 4                                                                | 7                                                     |
|-----------------------|---------------------------------------------------------|------------------------------------------------------------------|-------------------------------------------------------|
| Organizational status | Loose and fragile<br>Mold                               | Hard texture,<br>basically uniform,<br>with smaller<br>particles | Fine texture and<br>smooth                            |
| Texture pattern       | Perforated and not<br>dense                             | Unclear texture<br>pattern                                       | Clear texture                                         |
| Colour                | Yellowish or other<br>colour                            |                                                                  | White clean colour<br>or<br>bright-colored            |
| Smell and taste       | Abnormal flavour <sup>a</sup><br>and odour <sup>b</sup> |                                                                  | Normal flavour <sup>a</sup><br>and odour <sup>b</sup> |
| Spiciness preference  | Disliked                                                | Acceptable                                                       | Favourite                                             |

<sup>a</sup> Abnormal flavor = strong, rancid burning or fruity flavor. Normal flavor = slightly sour and salty.

<sup>b</sup> Abnormal odor = strong rancid or fruity and yeasty odor. Normal odor = reflecting mainly that from acetic acid and short-medium chain free fatty acids.

**Table.S4. The relationship between the spiciness level and the score.**

| Level                | Score |
|----------------------|-------|
| Not spicy            | 0     |
| Mild spicy           | 1-3   |
| Low-level spicy      | 4-6   |
| Moderate-level spicy | 7-9   |
| High-level spicy     | 10-12 |

**Table.S5. The score of cheese containing different concentration of capsaicin.**

| The concentration of Cap (mg/50g DF) | Score    | Level           |
|--------------------------------------|----------|-----------------|
| 1                                    | 0.5±0.50 | Not spicy       |
| 6                                    | 4±0.77   | Low-level spicy |
| 9                                    | 5.3±0.64 | Low-level spicy |
